# Supplementary material for: Ultra-robust, highly proton-conductive polymer carbon dot membranes through bioinspired complexation
Source: Royal Society of Chemistry journal article supplement (doi:10.1039/d2ta02460h), 2022-01-01
Supplement: d2ta02460h1.pdf [file d2ta02460h1.pdf]

# Ultra-robust, Highly Proton-conductive Polymer Carbon Dots Membranes through Bioinspired Complexation

Benbing Shi<sup>a,b,‡</sup>, Xiao Pang<sup>a,b,‡</sup>, Hong Wu<sup>a,b</sup>, Jianliang Shen<sup>a,b</sup>, Jingyuan Guan<sup>a,b</sup>, Xiaoyao Wang<sup>a,b</sup>, Chunyang Fan<sup>a,b</sup>, Li Cao<sup>a,b</sup>, Tianhao Zhu<sup>a,b</sup>, Zhuoyu Yin<sup>a,b</sup>, Yan Kong<sup>a,b</sup>, Yiqin Liu<sup>a,b</sup>, Sijia Wang<sup>a,b</sup>, and Zhongyi Jiang<sup>\*a,b,c,d</sup>

<sup>a</sup>Key Laboratory for Green Chemical Technology, School of Chemical Engineering and Technology, Tianjin University, Tianjin 300072, China.

<sup>b</sup>Collaborative Innovation Center of Chemical Science and Engineering (Tianjin), Tianjin 300072, China.

<sup>c</sup>Joint School of National University of Singapore and Tianjin University, International Campus of Tianjin University, Binhai New City, Fuzhou, 350207, China.

<sup>d</sup>Zhejiang Institute of Tianjin University, Ningbo, Zhejiang 315201, China.

‡ These authors contributed equally.

E-mail: [zhyjiang@tju.edu.cn](mailto:zhyjiang@tju.edu.cn)

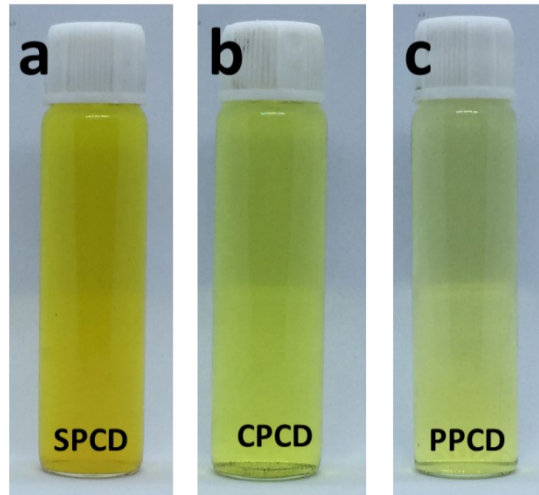

**Fig. S1** Photograph of the PCD solution (SPCD(a), CPCD(b), PPCD(c)).

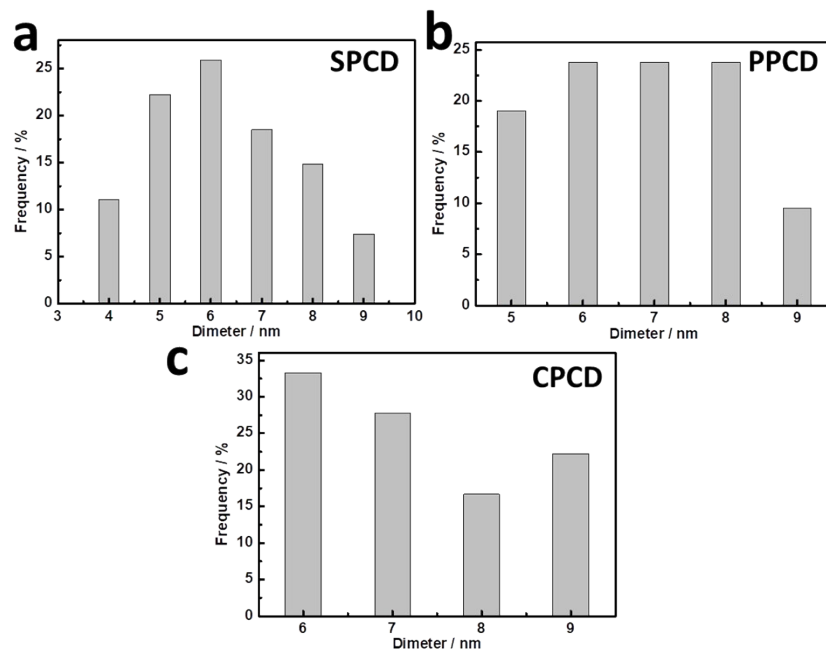

**Fig. S2** Frequency distribution histogram of the size of the PCDs(SPCD(a), CPCD(b), PPCD(c)).

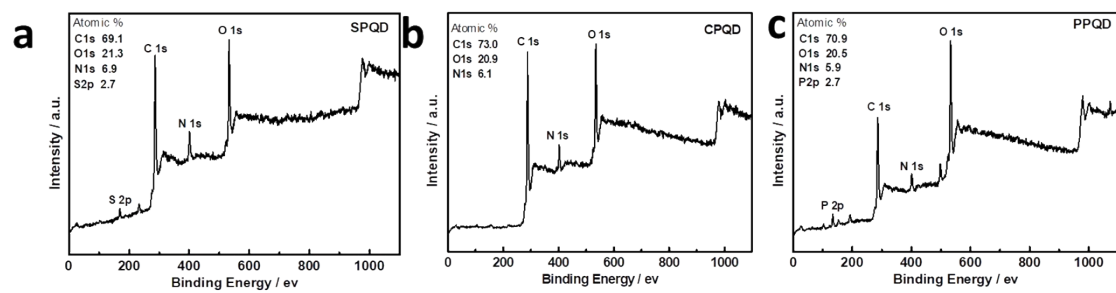

**Fig. S3** XPS spectra and the element content of the PCDs (SPQD(a), CPQD(b), PPQD(c)).

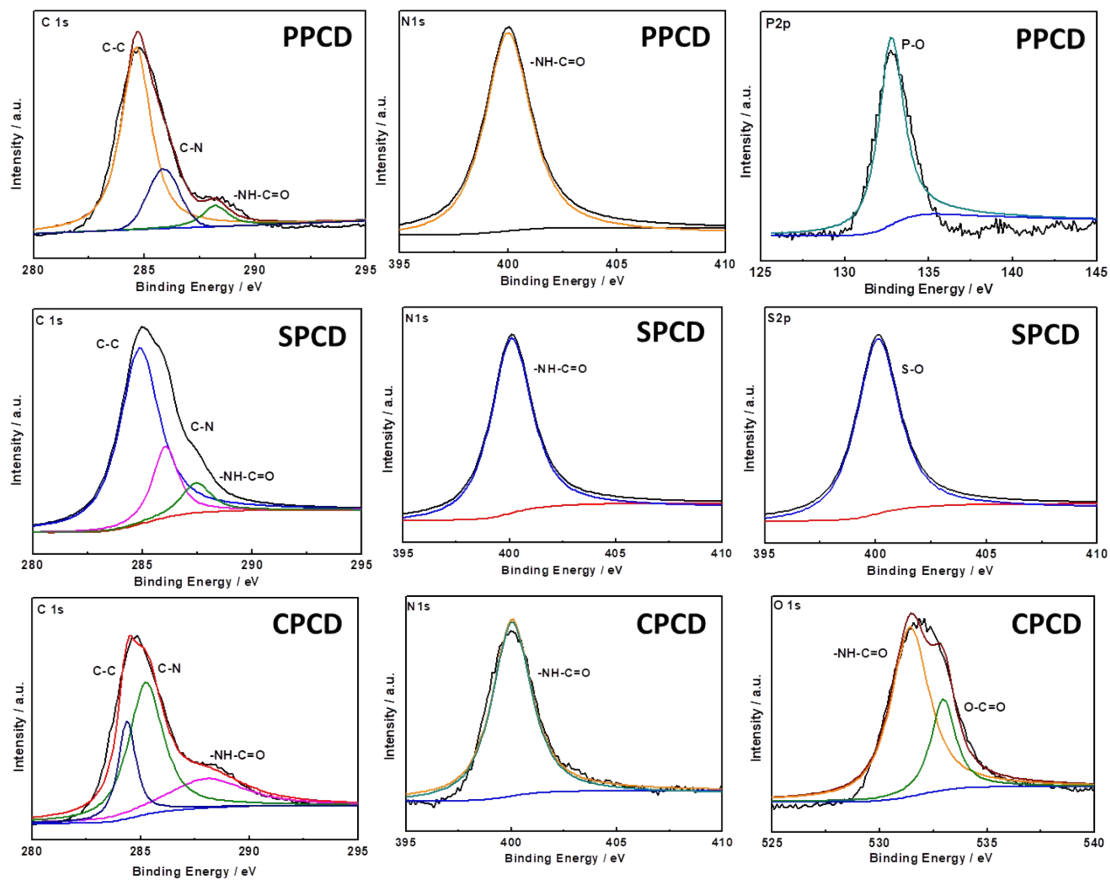

**Fig.S4** High-resolution XPS spectra of PCDs

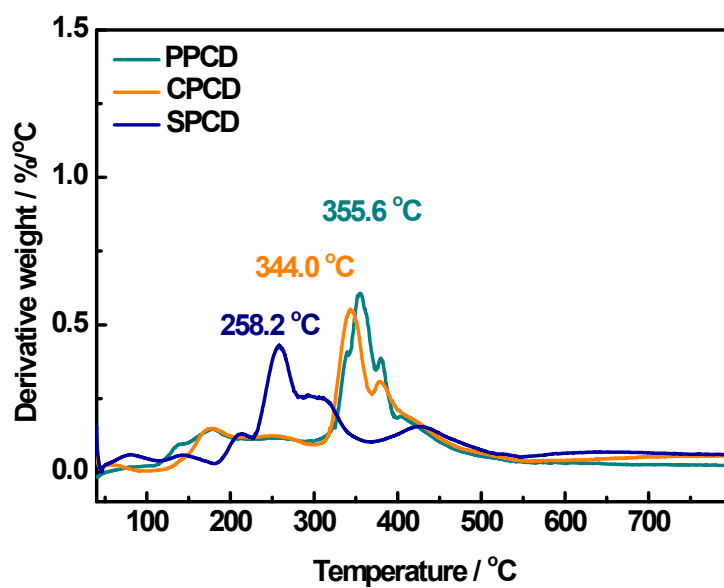

Fig. S5 DTG curves of the PCDs.

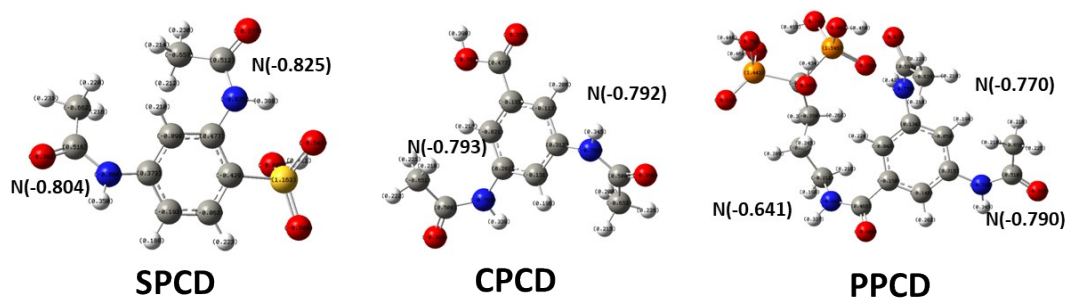

**Fig. S6** The charge distribution of N atom in PCD.

The molecular electrostatic potential (MEP) values of the functional groups were calculated in the GAUSSIAN 09W package at the DFT/B3LYP level. The electron density on N atom was related to the charge distribution and higher negative charge indicates higher electron density, and vice versa.

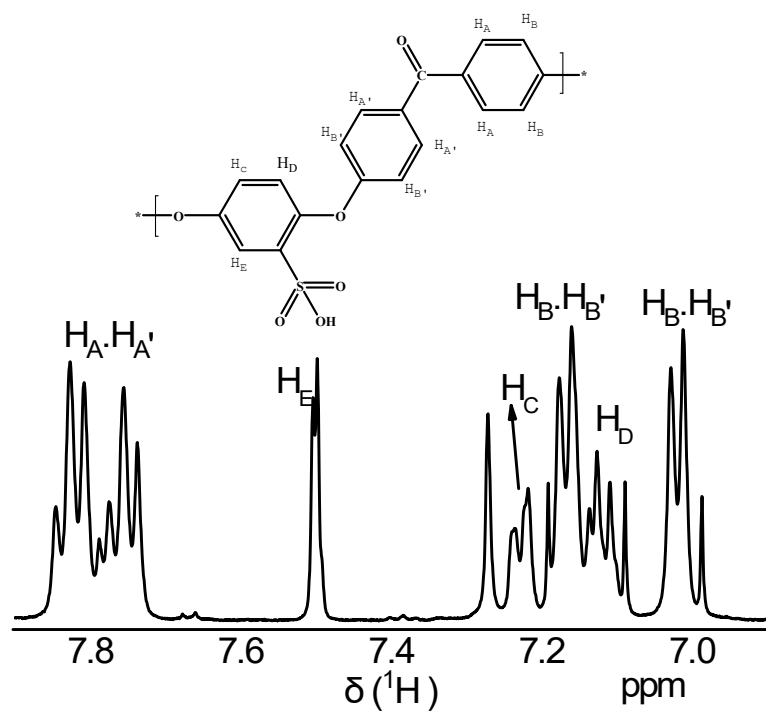

**Fig. S7** <sup>1</sup>H-NMR spectrum of the SPEEK.



**Table S1** The weight loss of PCDs in PCDMs.

| Sample   | Weight loss<br>(wt.%) |
|----------|-----------------------|
| SPCDM-50 | 1.5                   |
| PPCDM-50 | 1.9                   |
| CPCDM-50 | 2.4                   |
| SPCDM-55 | 3.7                   |
| PPCDM-55 | 4.2                   |
| CPCDM-55 | 4.7                   |

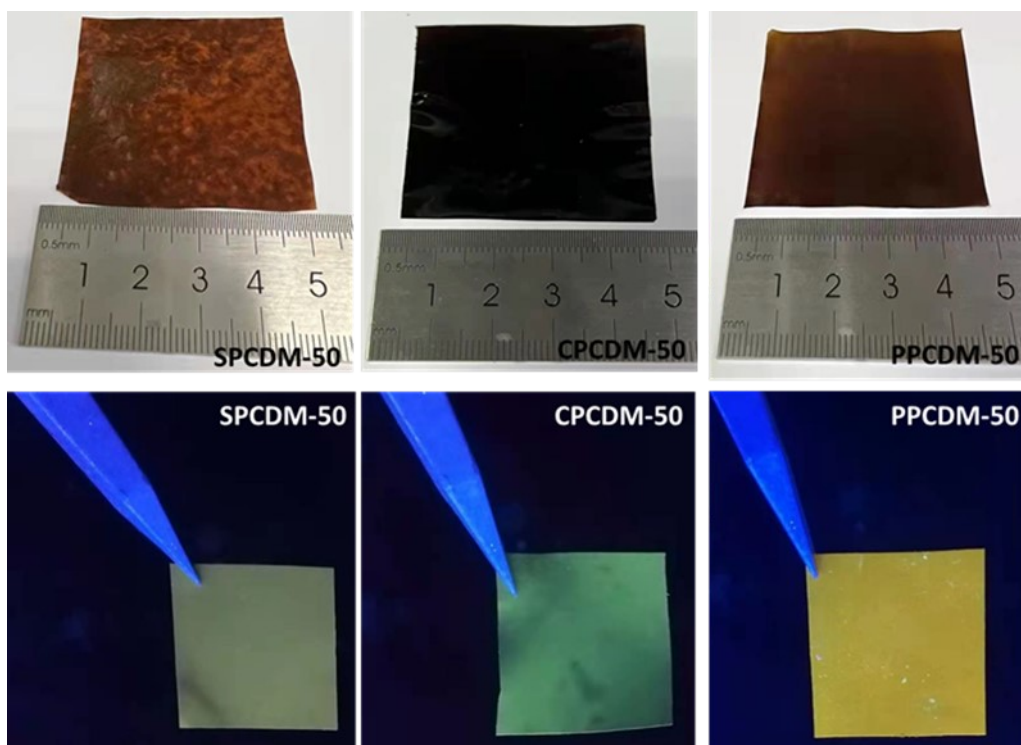

**Fig. S8** Fluorescence phenomenon of the PCDMs under UV(365 nm).

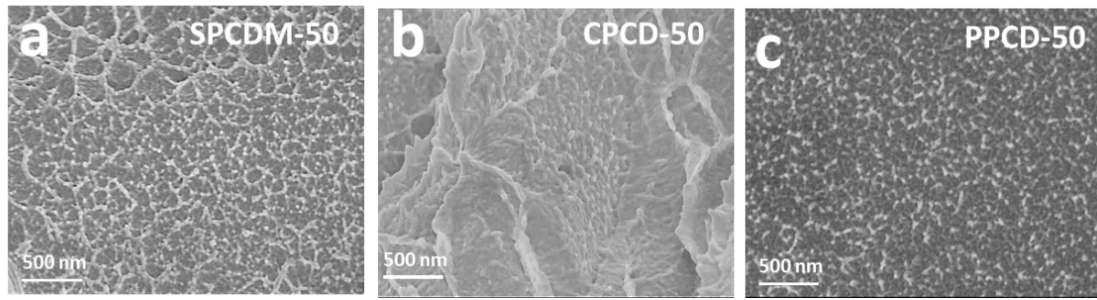

**Fig. S9** SEM images of the cross section of the PCDMs.

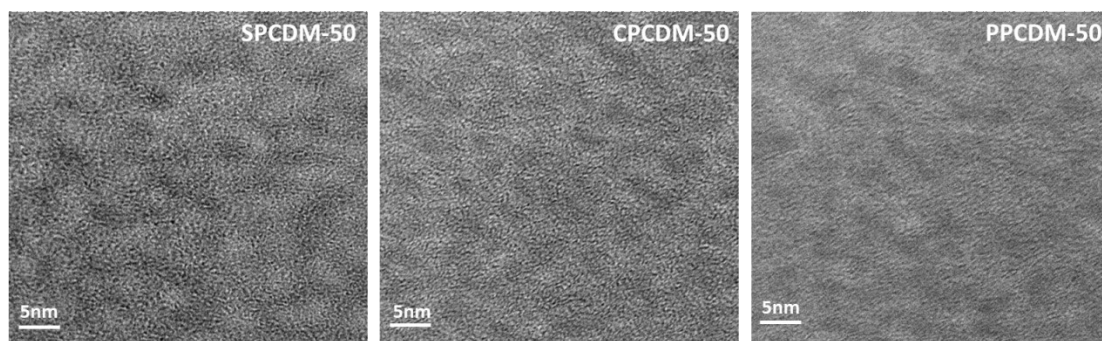

**Fig. S10** TEM images of the PCDM.

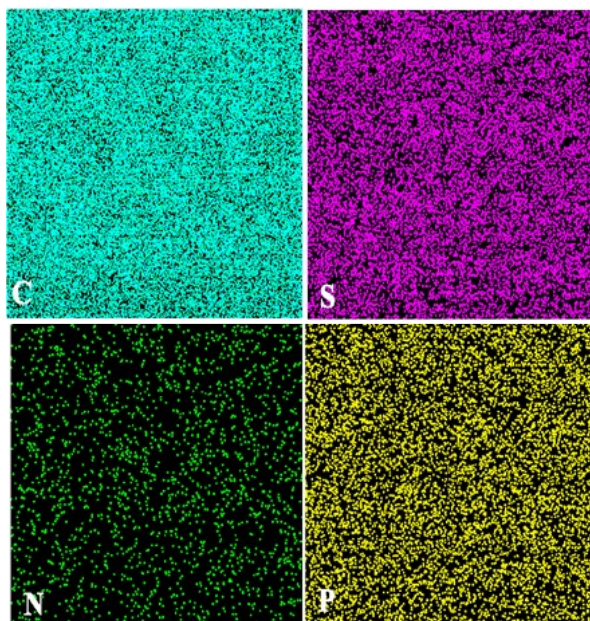

**Fig. S11** Element distribution in PCDMs.

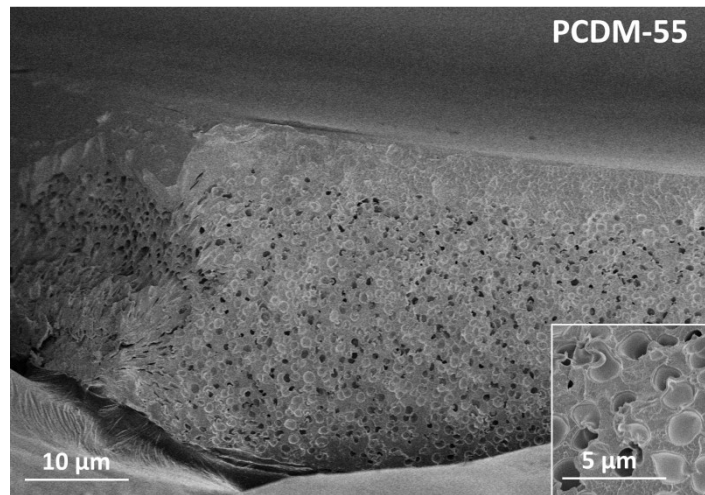

**Fig. S12** SEM image of cross section the PCDM-55.

**Table S2.** Proton conductivity, IEC values, and mechanical stability of PCDMs and membranes in literature

| Membrane                 | IEC values (mmol g <sup>-1</sup> ) | Stress (MPa) | Proton conductivity(mS cm <sup>-1</sup> (Temperature/ °C) | Reference |
|--------------------------|------------------------------------|--------------|-----------------------------------------------------------|-----------|
| PTFE48/SPEEK65           | 1.44                               | 27.2         | 183 (90)                                                  | 1         |
| Aq-PSUT (30%)            | 1.02                               | 20           | 180(80)                                                   | 2         |
| Su-CNTs/Nafion           | 0.98                               | 20.6         | 216 (99)                                                  | 3         |
| SPPEK-SF-7.5             | 1.62                               | 31.4         | 226.7(90)                                                 | 4         |
| Nafion/CeO2-TiC(0.5 wt%) | 0.87                               | 46.9         | 90(90)                                                    | 5         |
| PTPBSH-90                | 2.44                               | 51.2         | 119(90)                                                   | 6         |
| Nafion-ZrGdNR-1.5        | 0.909                              | 22.5         | 164(80)                                                   | 7         |
| M-BC                     | 1.75                               | 25           | 90.2 (80)                                                 | 8         |
| GO-g-SPEEK/Nafion-33     | 1.45                               | 8.6          | 219(90)                                                   | 9         |
| Me-m-SPEEK               | 1.78                               | 55.4         | 173(100)                                                  | 10        |
| SPP-QP                   | 2.6                                | 34           | 220 (80)                                                  | 11        |
| SPEEK/S-UiO-66@GO-10     | 1.7                                | 53.5         | 268(70)                                                   | 12        |
| SPAFT5                   | 1.77                               | 44.3         | 105(80)                                                   | 13        |
| SF-Nafion-1              | 0.932                              | 13           | 130(80)                                                   | 14        |
| MIV                      | 0.56                               | 6.25         | 32(80)                                                    | 15        |
| SPAES-8-33               | 1.66                               | 20.51        | 331(80)                                                   | 16        |
| 6F-PAEK-SP22             | 1.77                               | 29.5         | 148(100)                                                  | 17        |
| SPI-5-POSS               | 1.69                               | 40.8         | 132(80)                                                   | 18        |
| C-SPAES-40               | 2.12                               | 71.5         | 150.4(80)                                                 | 19        |
| PEEK-PEMs                | 3.08                               | 14           | 431(80)                                                   | 20        |
| SPEKEBI-4                | 2.14                               | 11           | 233(80)                                                   | 21        |
| SPAEK-100                | 1.49                               | 45.34        | 159(100)                                                  | 22        |
| SPAES50                  | 1.84                               | 54.86        | 211.6 (80)                                                | 23        |
| SPEEK/PANTs-3#-10        | 1.869                              | 57.25        | 330(70)                                                   | 24        |
| poly(SHS-ddm)            | 3.13                               | 32.49        | 154 (80)                                                  | 25        |
| SPAES 50                 | 2.01                               | 9.2          | 181(80)                                                   | 26        |
| SPES-3                   | 1.51                               | 27           | 131.4(100)                                                | 27        |
| sPBT-PE57.5              | 2.55                               | 49.2         | 130(80)                                                   | 28        |
| SPP-co-PAEK(5/1)         | 2.38                               | 46           | 233(60)                                                   | 29        |
| PEM-OH                   | 1.6                                | 48           | 100(80)                                                   | 30        |
| Am-SPEEK-T               | 1.53                               | 53.8         | 140 (80)                                                  | 31        |
| 2-SPAES-80               | 1.73                               | 53           | 258(80)                                                   | 32        |
| SPAEK                    | 1.73                               | 49           | 130(120)                                                  | 33        |
| PPCDM-50                 | 2.53                               | 56           | 264(80)                                                   | This work |

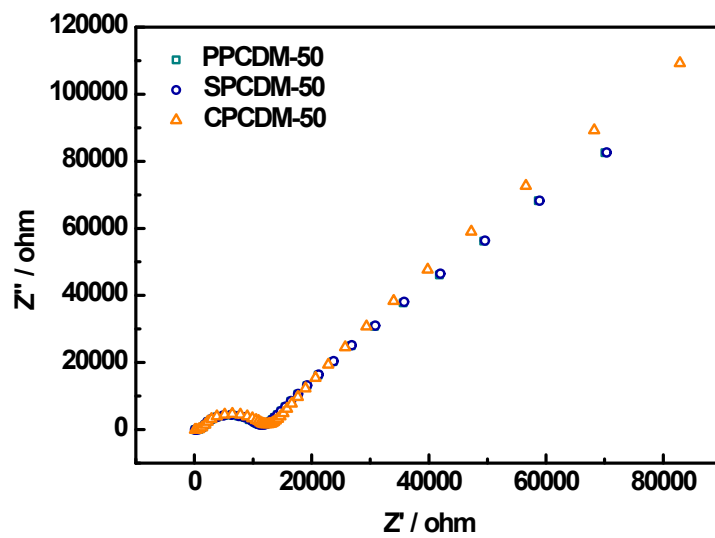

Fig.S13 Nyquist plot of the PCDMs at 30 °C under 100% RH.



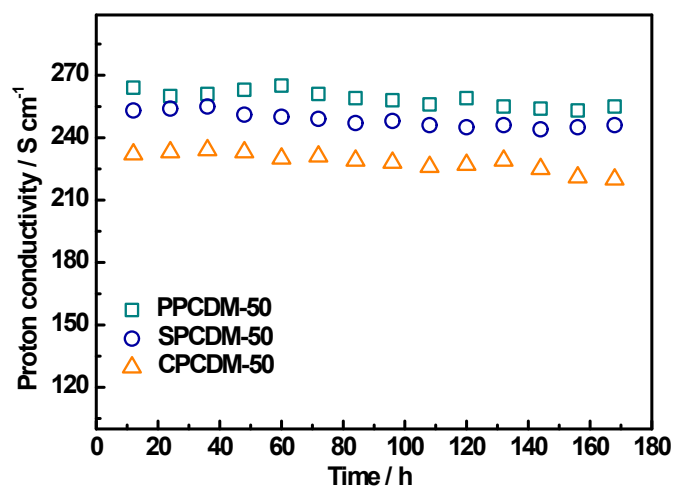

**Fig. S14** Time dependent proton conductivity of PCDMs at 80 °C under 100% RH

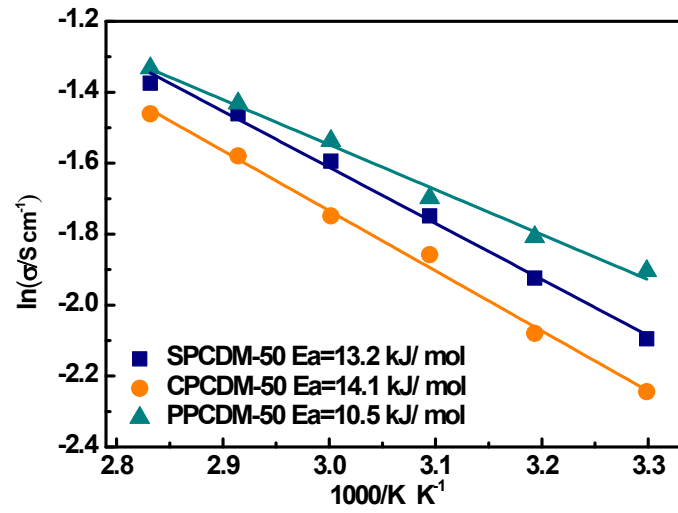

**Fig. S15** Arrhenius plots of the proton conductivities of the membranes.

**Table S3** H<sub>2</sub> permeability of the PCDM before and after water treatment

| Sample   | H <sub>2</sub> permeability / Barrier<br>(without water treatment) | H <sub>2</sub> permeability / Barrier<br>(water treatment) |
|----------|--------------------------------------------------------------------|------------------------------------------------------------|
| SPCDM-50 | 22.33                                                              | 9.67                                                       |
| CPCDM-50 | 59.97                                                              | 22.2                                                       |
| PPCDM-50 | 35.43                                                              | 13.11                                                      |
| SPCDM-55 | 1557.7                                                             | 37.88                                                      |

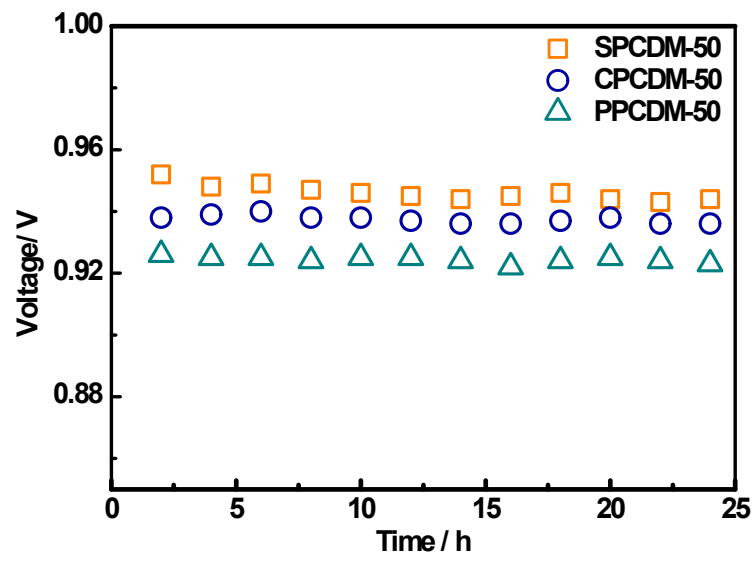

Fig. S16 Durability of the MEAs at 40 mA/cm<sup>2</sup>.

## References

- 1 G. C. Park and D. Kim, *Polymer*, 2021, **218**, 123506.
- 2 R. Sood, S. Giancola, A. Donnadio, M. Zatoń, N. Donzel, J. Rozière, D. J. Jones and S. Cavaliere, *Journal of Membrane Science*, 2021, **622**, 119037.
- 3 L. Qian, C. Yin, L. Liu, X. Zhang, J. Li, Z. Liu, H. Zhang, P. Fang and C. He, *Journal of Materials Science*, 2021, **56**, 6764–6779.
- 4 W. Chen, M. Chen, D. Zhen, T. Li, X. Wu, S. Tang, L. Wan, S. Zhang and G. He, *ACS Applied Materials and Interfaces*, 2020, **12**, 40740–40748.
- 5 M. Vinothkannan, S. Ramakrishnan, A. R. Kim, H. K. Lee and D. J. Yoo, *ACS Applied Materials and Interfaces*, 2020, **12**, 5704–5716.
- 6 A. Ghorai, A. K. Mandal and S. Banerjee, *Journal of Polymer Science*, 2020, **58**, 263–279.
- 7 D. Han, S. I. Hossain, B. Son, D. H. Lee and S. Shanmugam, *ACS Sustainable Chemistry and Engineering*, 2019, **7**, 16889–16899.
- 8 Y. Sui, Y. Du, H. Hu, J. Qian and X. Zhang, *Journal of Materials Chemistry A*, 2019, **7**, 19820–19830.
- 9 K. Oh, O. Kwon, B. Son, D. H. Lee and S. Shanmugam, *Journal of Membrane Science*, 2019, **583**, 103–109.
- 10 H. Zhang, R. J. Stanis, Y. Song, W. Hu, C. J. Cornelius, Q. Shi, B. Liu and M. D. Guiver, *Journal of Power Sources*, 2017, **368**, 30–37.
- 11 J. Miyake, R. Taki, T. Mochizuki, R. Shimizu, R. Akiyama, M. Uchida and K. Miyatake, *Science Advances*, , 2017, **3**.
- 12 H. Sun, B. Tang and P. Wu, *ACS Applied Materials and Interfaces*, 2017, **9**, 26077–26087.
- 13 P. Salarizadeh, M. Javanbakht and S. Pourmahdian, *RSC Advances*, 2017, **7**, 8303–8313.
- 14 J. Li, K. Fan, W. Cai, L. Ma, G. Xu, S. Xu, L. Ma and H. Cheng, *Journal of Power Sources*, 2016, **332**, 37–41.
- 15 L. Ahmadian-Alam, M. Kheirmand and H. Mahdavi, *Chemical Engineering Journal*, 2016, **284**, 1035–1048.
- 16 D. Liu, D. Tao, J. Ni, X. Xiang, L. Wang and J. Xi, *Journal of Materials Chemistry C*, 2016, **4**, 1326–1335.
- 17 J. Pang, X. Jin, Y. Wang, S. Feng, K. Shen and G. Wang, *Journal of Membrane Science*, 2015, **492**, 67–76.
- 18 Z. Wu, S. Zhang, H. Li, Y. Liang, Z. Qi, Y. Xu, Y. Tang and C. Gong, *Journal of Power Sources*, 2015, **290**, 42–52.
- 19 T. Ko, K. Kim, B. K. Jung, S. H. Cha, S. K. Kim and J. C. Lee, *Macromolecules*, 2015, **48**, 1104–1114.
- 20 T. Hamada, S. Hasegawa, H. Fukasawa, S. I. Sawada, H. Koshikawa, A. Miyashita and Y. Maekawa, *Journal of Materials Chemistry A*, 2015, **3**, 20983–20991.
- 21 M. Cui, Z. Zhang, T. Yuan, H. Yang, L. Wu, E. Bakangura and T. Xu, *Journal of Membrane Science*, 2014, **465**, 100–106.
- 22 H. Cheng, J. Xu, L. Ma, L. Xu, B. Liu, Z. Wang and H. Zhang, *Journal of Power Sources*, 2014, **260**, 307–316.
- 23 P. Wen, Z. Zhong, L. Li, F. Shen, X. D. Li and M. H. Lee, *Journal of Membrane Science*, 2014, **463**, 58–64.
- 24 G. He, L. Nie, X. Han, H. Dong, Y. Li, H. Wu, X. He, J. Hu and Z. Jiang, *Journal of Power Sources*, 2014, **259**, 203–212.
- 25 B. Yao, X. Yan, Y. Ding, Z. Lu, D. Dong, H. Ishida, M. Litt and L. Zhu, *Macromolecules*, 2014, **47**, 1039–1045.
- 26 D. M. Yu, S. Yoon, T. H. Kim, J. Y. Lee, J. Lee and Y. T. Hong, *Journal of Membrane Science*, 2013, **446**, 212–219.
- 27 S. Feng, K. Shen, Y. Wang, J. Pang and Z. Jiang, *Journal of Power Sources*, 2013, **224**, 42–49.
- 28 G. Wang, Y. Yao, G. Xiao and D. Yan, *Journal of Membrane Science*, 2013,

- 425–426**, 200–207.
- 29 X. Zhang, Z. Hu, Y. Pu, S. Chen, J. Ling, H. Bi, S. Chen, L. Wang and K. I. Okamoto, *Journal of Power Sources*, 2012, **216**, 261–268.
- 30 K. Enomoto, S. Takahashi, R. Rohani and Y. Maekawa, *Journal of Membrane Science*, 2012, **415–416**, 36–41.
- 31 J. Wang, C. Zhao, L. Zhang, M. Li, J. Ni, S. Wang, W. Ma, Z. Liu and H. Na, *International Journal of Hydrogen Energy*, 2012, **37**, 12586–12596.
- 32 C. Wang, D. W. Shin, S. Y. Lee, N. R. Kang, Y. M. Lee and M. D. Guiver, *Journal of Membrane Science*, 2012, **405–406**, 68–78.
- 33 J. E. Kim and D. Kim, *Journal of Membrane Science*, 2012, **405–406**, 176–184.
